# Supplementary material for: Modification of chemical performance of dopants in xerogel films with entrapped ionic liquid
Source: Royal Society of Chemistry journal article supplement (doi:10.1039/b613288j), 2007-01-01
Supplement: b613288j.pdf [file b613288j.pdf]

## Supporting information

### Modification of Chemical Performance of Dopants in Sol-Gel Films with Entrapped Ionic Liquid

Afsaneh Safavi, Norouz Maleki, Mozghan Bagheri Dermani

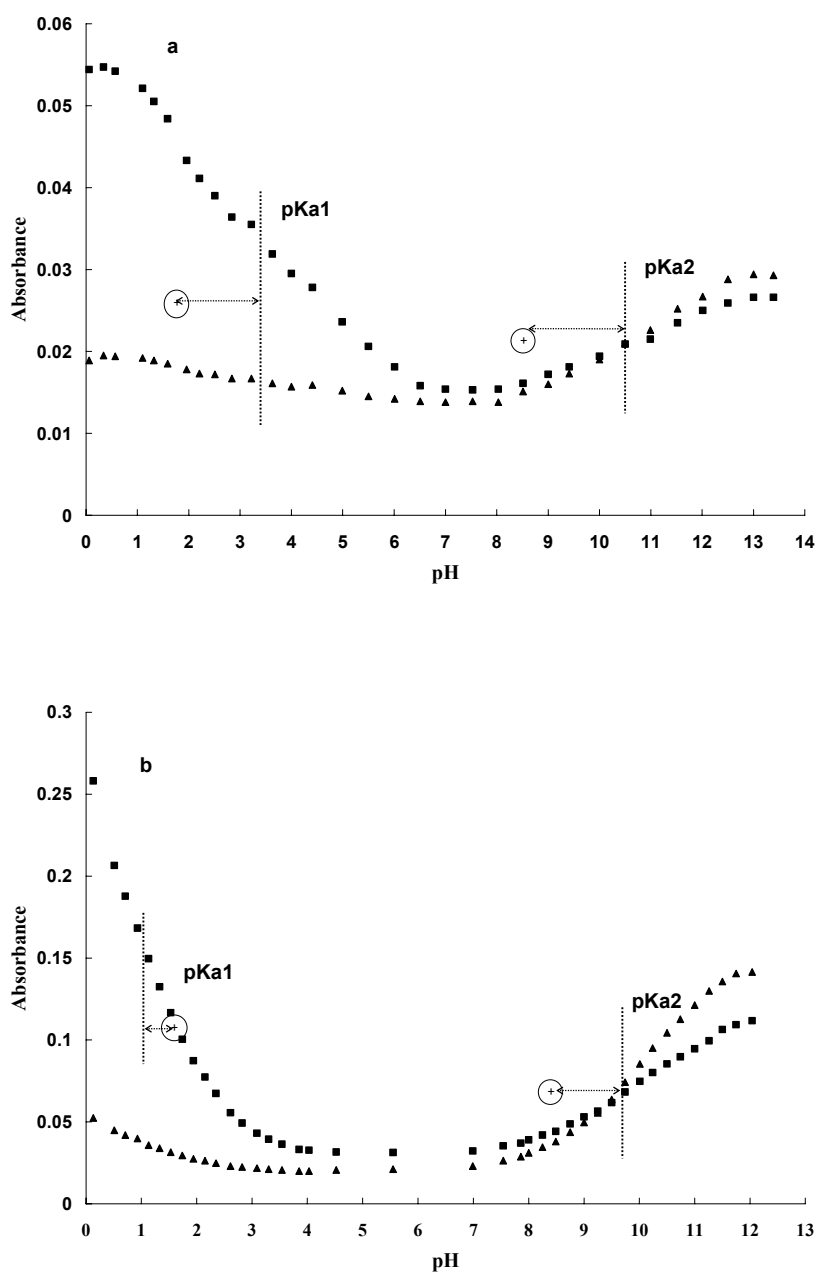

**Fig. S.1.** Titration curves of entrapped TB in (a) in unmodified sol-gel at 600 nm [▲], 550 nm [■] and in (b) modified sol-gel at 601 nm [▲], at 551 nm [■] and value in solution [⊕]

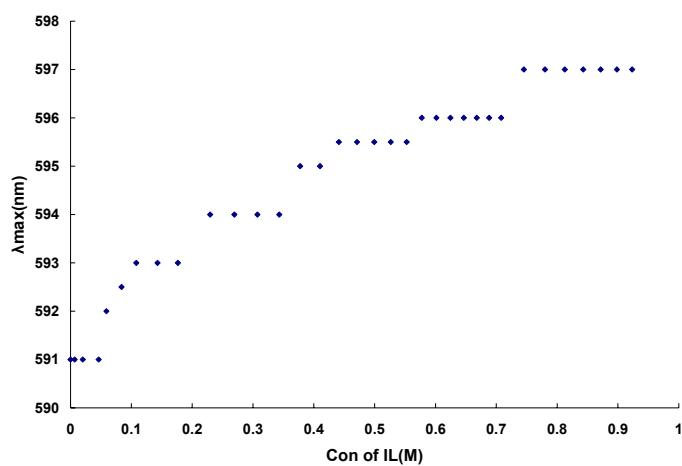

**Fig. S.2.** Effect of concentration of IL on shift of maximum wavelength of BPB in solution

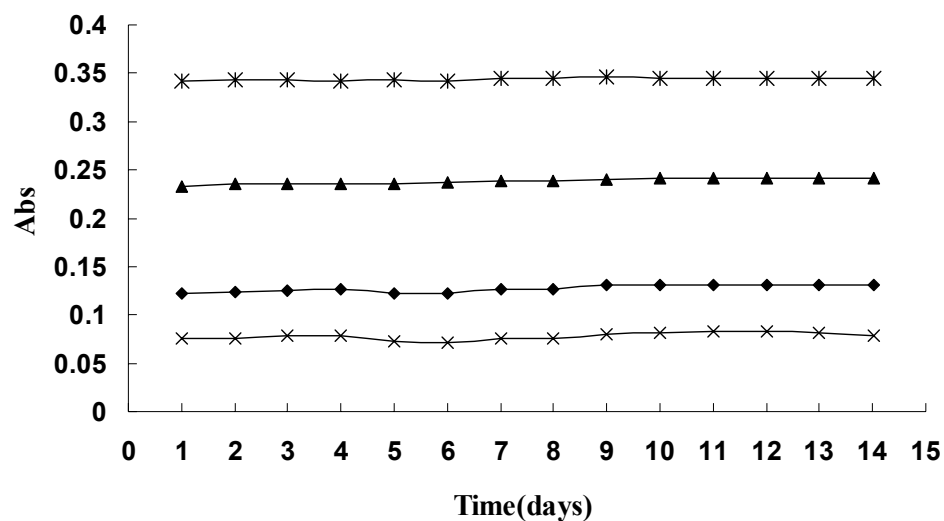

**Fig. S.3.** Leaching behaviors of BPR and TB in sol-gel matrix:

TB (x) at pH 1.6 and BPR (▲) at pH 9 in unmodified sol-gel and BPR-IL (ж) at pH 7 and TB-IL (◆) at pH 6 in IL-modified sol-gel

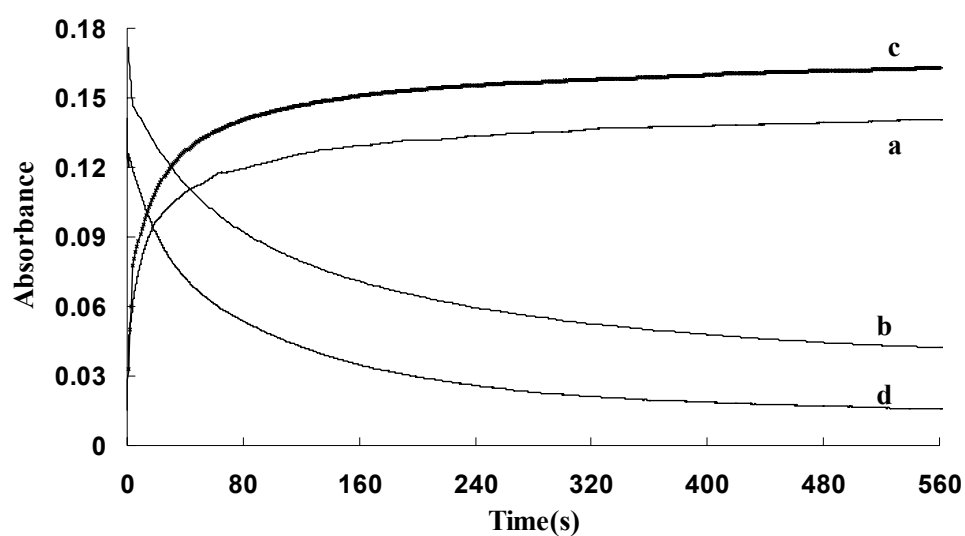

**Fig. S.4.** Typical response curve of BXB in unmodified sol-gel film as a function of time (a) at transition intervals 7 to 10 (b) 10 to 7; and in modified sol-gel by IL (c) at transition intervals 7 to 10 (d) 10 to

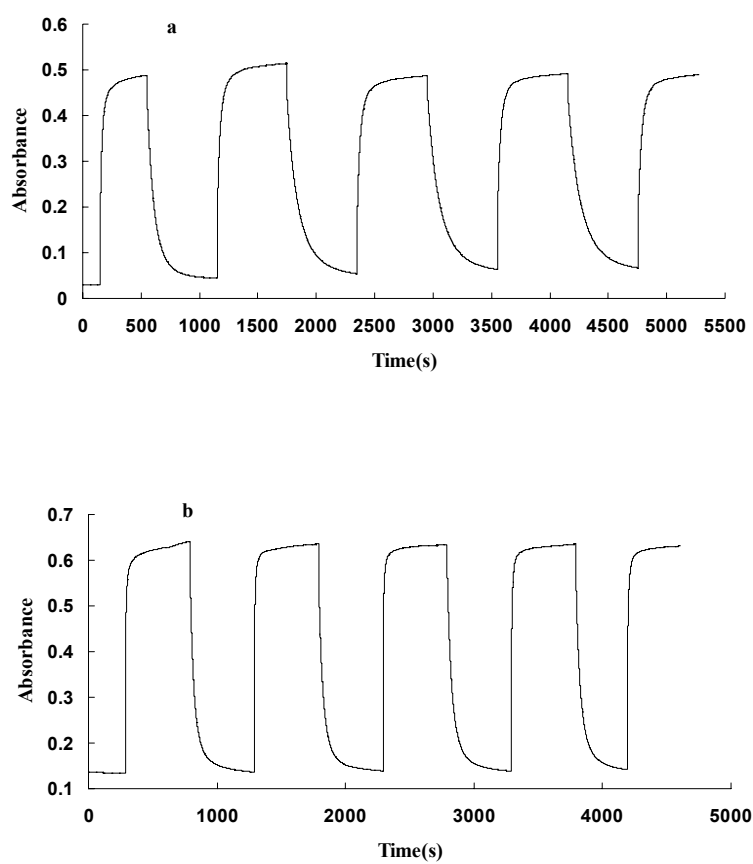

**Fig. S.5.** Variation of the absorbance of BCP (a) in unmodified and (b) in modified sol-gel film for five alternative change of pH from 6.5 to 9.5

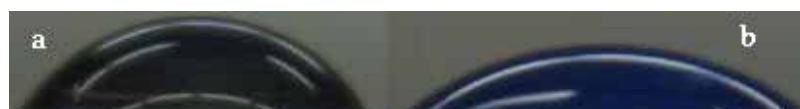

**Fig. S.6.** wettability of BCG entrapped in unmodified (a) and IL-modified sol-gel film (b)

**Table S. 1.** Typical storage stability of sol-gel films after 15 months storage in dry air

| Indicator | Freshly prepared |                 | After 15 months storage |                 |
|-----------|------------------|-----------------|-------------------------|-----------------|
|           | Response time(s) | pK <sub>a</sub> | Response time(s)        | pK <sub>a</sub> |
| BCG       | 359              | 8.2             | 882                     | 7.3             |
| BCG-IL    | 54               | 5.6             | 515                     | 7.1             |
| CPR       | 125              | 8.0             | 480                     | 7.3             |
| CPR-IL    | 39               | 6.5             | 340                     | 6.7             |
| BXB       | 140              | 9.5             | 175                     | 9.8             |
| BXB-IL    | 96               | 9.2             | 140                     | 10.4            |
